## Articles of interest in other COB journals

From *Journal of Cell Science*

### **$\beta$ 8 integrin regulates neurogenesis and neurovascular homeostasis in the adult brain**

Aaron K. Mobley, Jeremy H. Tchaicha, Jaekyung Shin, Mohammad G. Hossain and Joseph H. McCarty

Mobley, A. K. et al. 2009. *J. Cell Sci.* doi:10.1242/jcs.043257

### **Inhibitors of clathrin-dependent endocytosis enhance TGF $\beta$ signaling and responses**

Chun-Lin Chen, Wei-Hsien Hou, I-Hua Liu, George Hsiao, Shuan Shian Huang and Jung San Huang

Chen, C.-L. et al. 2009. *J. Cell Sci.* doi:10.1242/jcs.038729
